# Supplementary material
Source: HighWire-hosted journal article supplement (https://bmjopen.bmj.com/content/15/5/e095855)
Supplement: inline-supplementary-material-2 [file inline-supplementary-material-2.pdf]

**INFORMED CONSENT FORM**

**Project title: COMPARISON OF THE CLINICAL AND FUNCTIONAL OUTCOMES OF TWO IMMOBILISATION PROTOCOLS AFTER ARTHROSCOPIC PERIPHERAL TFCC REPAIR IN ADULTS - A SINGLE CENTER DOUBLE-BLINDED RANDOMISED CONTROLLED TRIAL**

I confirm I have read the Participant Information Sheet for the above study and its contents were explained and I have had the opportunity to ask questions and received satisfactory answers.

I understand that my participation in the study is voluntary and that I have the right to withdraw at any time without giving any reason, without my medical care or legal rights being affected.

I agree to take part in the above study. I confirm that I have received a copy of the Participant Information Sheet along with this signed and dated informed consent form.

Name of the Research Participant :

Age of the Research Participant :

Address of the Research Participant :

Occupation :

Annual Income of the Participant :  
(Indicate so if not ready to disclose)

Name & address of the nominee(s) and his relation to the Participant :

\_\_\_\_\_

\_\_\_\_\_  
Signature of the research subject

\_\_\_\_\_  
Date

\_\_\_\_\_  
Name & Signature of the witness

\_\_\_\_\_  
Date

\_\_\_\_\_  
Name & Signature of the person explaining the consent

\_\_\_\_\_  
Date
